# Supplementary material
Source: ML conference proceedings conference paper supplement (https://proceedings.mlr.press/v54/liu17a.html)
Supplement: Supplementary file [file liu17a-supp.pdf]

---

# Supplementary materials for Paper “Attributing Hacks”

---

**Ziqi Liu**  
Xi’an Jiaotong Univ.  
Ant Financial Group

**Alexander J. Smola**  
Amazon

**Kyle Soska**  
CMU

**Yu-Xiang Wang**  
CMU

**Qinghua Zheng**  
Xi’an Jiaotong Univ.

## A Proof of Theorem 1

When the feature  $x$  is constant, the hazard function for user  $j$

$$\lambda(t) = \sum_{i=1}^d x_{ji}(t)w_i(t)$$

and the cumulative hazard function

$$\begin{aligned} \Lambda(t) &= \int_{-\infty}^t \sum_{i=1}^d x_{ji}(t)w_i(t)dt = \sum_{i=1}^d \int_{-\infty}^t x_{ji}(t)w_i(t)dt \\ &= \sum_{i=1}^d \left( \sum_{\tau \in \mathcal{T}_i, \tau \leq t} \alpha_{i,\tau} W_i(\tau) + \alpha_{i,t} W_i(t) \right). \end{aligned} \quad (1)$$

where  $W_i(t) = \int_{-\infty}^t w_j(t)dt$ ,  $\mathcal{T}_i$  denotes all break points of the piecewise constant  $x_{ji}(t)$  and  $\alpha_{i,\tau}$  are coefficients that depends only on  $x_{ji}$ . When there are no uncensored observations, we can re-parameterize the above variational optimization problems using the  $\Lambda(t)$  hence  $W_j(t)$  alone:

$$\begin{aligned} \min_{(W_0, W_1, \dots, W_d) \in \mathcal{F}^d} & \mathcal{L}(\{\boldsymbol{\tau}, \boldsymbol{\Psi}, \mathbf{Z}\}, \mathbf{W}) + \gamma \sum_{j=0}^d \text{TV}(W_j) \\ \text{s.t. } & W_i(t) \geq 0, W_i(t + \delta) - W_i(t) \geq 0 \\ & \text{for any } i \in [p], t \in \mathbb{R}, \delta \in \mathbb{R}_+. \\ & W_i \text{ is convex.} \end{aligned}$$

Let  $\mathcal{T}$  be the set of observed time points (including  $0, T$  and all censored interval boundaries). For each  $i$ , let  $W_i^*$  be the optimal solution. By Proposition 7 of Mammen et al. (1997), we know that for each  $i$ , there is a spline  $\tilde{W}_i$  of order 1 such that

$$\begin{cases} \text{All knots of the spline are contained in } \mathcal{T} \setminus \{0, T\} \\ \tilde{W}_i(\tau) = W_i^*(\tau) \text{ for all } \tau \in \mathcal{T} \\ \text{TV}(\tilde{W}_i) \leq \text{TV}(W_i^*) \end{cases} \quad (2)$$

We will now show that  $\tilde{W}_i$  also defines a set of optimal solution using these properties.

Note that the loss function  $\mathcal{L}(\{\boldsymbol{\tau}, \boldsymbol{\Psi}, \mathbf{Z}\}, \mathbf{W})$  can be decomposed into the sum of negative log-probability of form as described in (8), and when there are no uncensored data, the value of the loss function is completely determined by the survival function  $S(t)$  evaluated at  $t \in \mathcal{T}$ . There is a one-to-one mapping between survival functions and the cumulative hazard functions through  $S(t) = \exp(-\Lambda(t))$ . It follows from (1) that  $\mathcal{L}(\{\boldsymbol{\tau}, \boldsymbol{\Psi}, \mathbf{Z}\}, \mathbf{W})$  is a function of  $\mathbf{W}$  only through its evaluations at  $\mathbf{W}(\mathcal{T})$ , therefore

$$\mathcal{L}(\{\boldsymbol{\tau}, \boldsymbol{\Psi}, \mathbf{Z}\}, \tilde{\mathbf{W}}) = \mathcal{L}(\{\boldsymbol{\tau}, \boldsymbol{\Psi}, \mathbf{Z}\}, \mathbf{W}^*).$$

By  $\text{TV}(\tilde{W}_i) \leq \text{TV}(W_i^*)$ , we know that  $\tilde{\mathbf{W}}$  has a smaller overall objective function than the optimal solution.

It remains to show that  $\tilde{\mathbf{W}}$  is feasible. First note that the only spline of order 1 that satisfy the first and second condition is the piecewise linear interpolation of the knots in  $\mathcal{T}$ . For each  $i$ , the constraints require that  $W_i^*$  obeys that  $W_i^*$  is non-negative, non-decreasing and convex. This ensures that the piecewise linear interpolation of any subset of points in the domain of  $W_i^*$  to be also nonnegative, monotonically nondecreasing and convex, which ensures the feasibility of  $\tilde{W}_i$ .

Finally,  $\tilde{W}_i$  can be represented by a nonnegative linear combination of truncated power basis functions defined on  $\mathcal{T}$  and the corresponding hazard function  $w_i$  can be represented by the same nonnegative combination of step functions defined at  $\mathcal{T}$ . This completes the proof.  $\square$

## B Additional experiments

### B.1 Real-World Case Study

Another spot check for the model is the ability to corroborate existing literature on malicious web defacement. Figure 1 demonstrates the change-points in  $\lambda_i(t)$  for specific versions of Wordpress. The model assigns Wordpress 2.9.2, 3.2.1, 3.3.1 and 3.5.1 change-points around July 2011, August 2011, December 2011, and February 2013 respectively. The work of Soska et

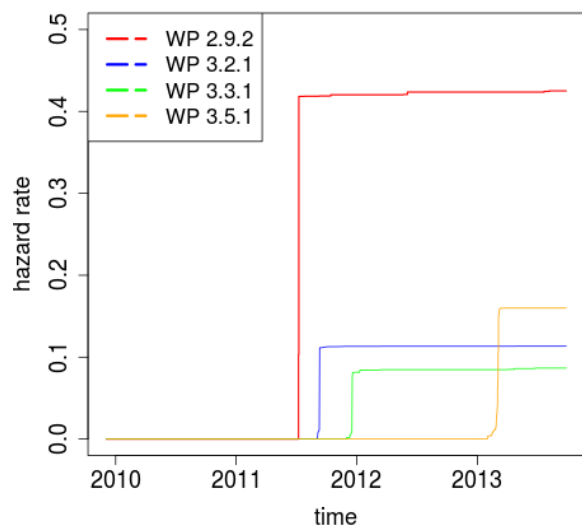

Figure 1:  $\lambda_t(i)$  of features known to correspond directly to particular versions of Wordpress.

al. Soska & Christin (2014) found nearly identical attack campaigns for Wordpress 2.9.2, 3.2.1 and 3.3.1 but failed to produce a meaningful result for 3.5.1.

## References

- Mammen, Enno, van de Geer, Sara, et al. Locally adaptive regression splines. *The Annals of Statistics*, 25(1):387–413, 1997.
- Soska, Kyle and Christin, Nicolas. Automatically detecting vulnerable websites before they turn malicious. *USENIX Security Symposium*, 2014.
